# Supplementary material for: The Kinase CIPK11 Functions as a Negative Regulator in Drought Stress Response in Arabidopsis
Source: PubMed Central journal article supplement (PMC6566343; doi:10.3390/ijms20102422), 2019-05-16
Supplement: ijms-20-02422-s001.pdf [file ijms-20-02422-s001.pdf]

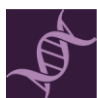

1 *Supplementary*

## 2 **The kinase CIPK11 functions as a negative regulator** 3 **in drought stress response in Arabidopsis**

4 Yanlin Ma, Jing Cao, Qiaoqiao Chen, Jiahan He, Zhibin Liu, Jianmei Wang, Xufeng Li and Yi  
5 Yang\*

6  
7 Key Laboratory of Bio-Resources and Eco-Environment of Ministry of Education, College of Life Sciences,  
8 Sichuan University, Chengdu 610065, China; maylok@163.com (Y.M.); Caojing94@163.com (J.C.);  
9 chenqqg7@sina.com (Q.C.); SCU\_hjh@163.com (J.H.); lzb2003@163.com (Z.L.); wangjianmei@scu.edu.cn (J.W.);  
10 lixufeng0507@gmail.com (X.L.)

11 \* Correspondence: [yangyi528@scu.edu.cn](mailto:yangyi528@scu.edu.cn)

12

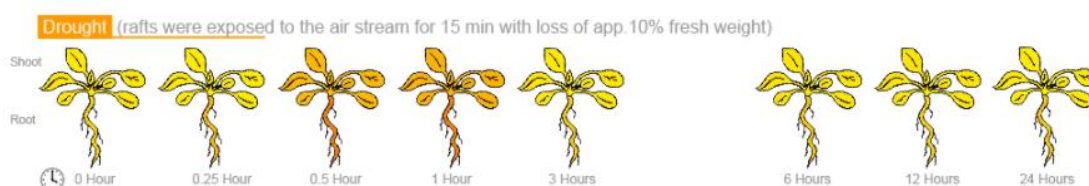

14

14 Figure S1. Inducible expression of *CIPK11* by drought stress obtained from the Electronic  
15 Fluorescent Pictograph (e-FP) browser.

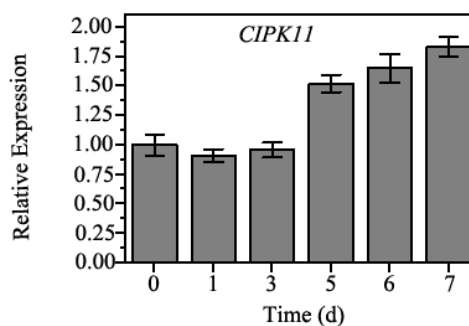

17

17 Figure S2. Quantitative measurement of the *CIPK11* transcript levels in 28-day-old Col-0  
18 plants after drought stress for 0, 1, 3, 5, 6, or 7 days for qRT-PCR. Actin 2 was used as  
19 internal control. Values are means  $\pm$ SD (n = 3).

20

21

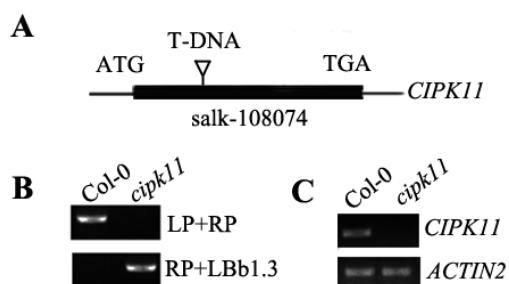

22

23 Figure S3. Identification of Arabidopsis *cipk11* mutant. (A) Structure of Arabidopsis  
24 *CIPK11* and T-DNA insertion site in *cipk11* mutant (Salk\_108074). (B) Molecular analysis of  
25 *cipk11* and Col-0, primers LP, RP and LBb1.3 were used to target the flanking sequences of  
26 the T-DNA. (C) Semi-quantitative RT-PCR analysis of *CIPK11* expression in Col-0 and  
27 *cipk11* plants.

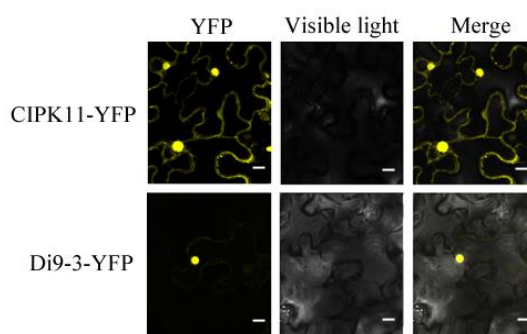

28

29 Figure S4. Subcellular localization of *CIPK11* and *Di19-3* proteins in the epidermal peel  
30 cells of *Nicotiana benthamiana*. All the constructs showed cytoplasmic and nucleoplasmic  
31 localization when they were transiently expressed in *Nicotiana benthamiana* epidermal  
32 cells.

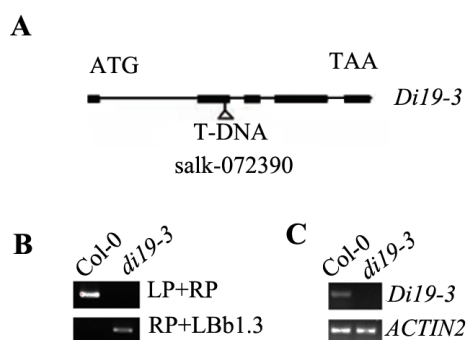

33

34 Figure S5. Identification of Arabidopsis *di19-3* mutant. (A) Structure of Arabidopsis *Di19-3*  
35 and T-DNA insertion site in *di19-3* mutant (Salk\_072390). (B) Molecular analysis of *di19-3*  
36 and Col-0, primers LP, RP and LBb1.3 were used to target the flanking sequences of the  
37 T-DNA. (C) Semi-quantitative RT-PCR analysis of *Di19-3* expression in Col-0 and *di19-3*  
38 plants.

39 Table S1. List of primers used in the current study.  
40

| S.N. | Name of primer                  | Sequence of primers                    |
|------|---------------------------------|----------------------------------------|
| 1    | SALK_108074( <i>cipk11</i> )-LP | 5'-CGCGTTTAAACTCTTCACAGC-3'            |
| 2    | SALK_108074( <i>cipk11</i> )-RP | 5'-ATCTTTTAAAAGCTTCCGCG-3'             |
| 3    | SALK_072390( <i>di19-3</i> )-LP | 5'-TCATATAACCCCTTCAGCACGC-3'           |
| 4    | SALK_072390( <i>di19-3</i> )-RP | 5'-TGATTAGTTTGGGGATACCCC-3'            |
| 5    | CIPK11-F                        | 5'-CGGAATTCATGCCAGAGATCGAGATTGC-3'     |
| 6    | CIPK11-R                        | 5'-CGGGATCCAATAGCCGCGTTTGTGACGAC-3'    |
| 7    | LBb1.3                          | 5'-ATTTTGCCGATTCGGAAC-3'               |
| 8    | ACT2 RT-F                       | 5'-TCAGATGCCCAGAAGTCTTGTTTC-3'         |
| 9    | ACT2 RT-R                       | 5'-GTGGATTCCAGCAGCTTCCA-3'             |
| 10   | 35S-F                           | 5'-CAAACGAATCTCAAGCAATC-3'             |
| 11   | FLAG-R                          | 5'-TGTCGTCATCGTCTTTGTAGTC-3'           |
| 12   | DI19-3-GST-F                    | 5'-CGGGATCCATGGATTCCGATTCATGGAGT-3'    |
| 13   | DI19-3-GST-R                    | 5'-CGGAATTCCTATAAGCTGTCATCAAGAATCGT-3' |
| 14   | CIPK11-KD-GST-F                 | 5'-CGGGATCCATGCCAGAGATCGAGATTGC-3'     |
| 15   | CIPK11-KD-GST-R                 | 5'-CGGAATTCCTATCCTCTAACAACCAAGGATC-3'  |
| 16   | pUC-SPYCE-CIPK11-F              | 5'-ACGGATCCATGCCAGAGATCGAGATTGC-3'     |
| 17   | pUC-SPYCE-CIPK11-R              | 5'-CGGTGCGACAATAGCCGCGTTTGTGACGAC-3'   |
| 18   | pUC-SPYCE-CIPK11-KD-F           | 5'-ACGGATCCATGCCAGAGATCGAGATTGC-3'     |
| 19   | pUC-SPYCE-CIPK11-KD-R           | 5'-CGGTGCGACTCCTCTAACAACCAAGGATCT-3'   |
| 20   | pUC-SPYNE-DI19-3-F              | 5'-CGGGATCCATGGATTCCGATTCATGGAGT-3'    |
| 21   | pUC-SPYNE-DI19-3-R              | 5'-CGGAATTCTAAGCTGTCATCAAGAATCGT-3'    |
| 22   | pGBKT7-CIPK11-F                 | 5'-CGGGATCCGATGCCAGAGATCGAGATTG-3'     |
| 23   | pGBKT7-CIPK11-R                 | 5'-ACGCGTCGACAAATAGCCGCGTTTGTGAC-3'    |
| 24   | pGBKT7-CIPK11-KD-F              | 5'-CGGGATCCATGCCAGAGATCGAGATTGC-3'     |
| 25   | pGBKT7-CIPK11-KD-R              | 5'-ACGCGTCGACTTATCCTCTAACAACCAAG-3'    |
| 26   | pGADT7-DI19-3-F                 | 5'-CGGGATCCATGGATTCCGATTCATGGAGT-3'    |
| 27   | pGADT7-DI19-3-R                 | 5'-CGGAATTCCTATAAGCTGTCATCAAGAATCGT-3' |
| 28   | RD29A-real time-F               | 5'-CAGAGGAACCACCACTCAACACA-3'          |
| 29   | RD29A-real time-R               | 5'-CTCTAGGTTTACCTGTTACGCCTG-3'         |
| 30   | RD29B-real time-F               | 5'-ATGGAGTCACAGTTGACACGTCCT-3'         |
| 31   | RD29B-real time-R               | 5'-CTTCTGGGTCTTGCTCGTCATACT-3'         |
| 32   | RAB18-real time-F               | 5'-ATGGCGTCTTACCAGAACCGTCCA-3'         |
| 33   | RAB18-real time -R              | 5'-ACCACCACTTTCCTTGTGGAGTTG-3'         |
| 34   | DREB2A-real time-F              | 5'-GAATGGTGCGGAAGAGATGAAG-3'           |
| 35   | DREB2A-real time -R             | 5'-GTTCAAACCTCGCTCAGCCAAT-3'           |
| 36   | CIPK11-real time-F              | 5'-GTCGGGATTGTTTGCTGGTTGT-3'           |
| 37   | CIPK11-real time-R              | 5'-TTCCATTTTGCCCCTCCATCT-3'            |
| 38   | DI19-3-real time-F              | 5'-TTGTCTCTCTGCTGCCACAT-3'             |
| 39   | DI19-3-real time-R              | 5'-TCTTGGTTTTCTTTCGCGGTGC-3'           |

|    |                    |                             |
|----|--------------------|-----------------------------|
| 40 | ACTIN2-real time-F | 5'-TTGACTACGAGCAGGAGATGG-3' |
| 41 | ACTIN2-real time-R | 5'-ACAAACGAGGGCTGGAACAAG-3' |

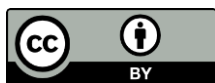

© 2019 by the authors. Submitted for possible open access publication under the terms and conditions of the Creative Commons Attribution (CC BY) license (<http://creativecommons.org/licenses/by/4.0/>).
